# Supplementary material
Source: PubMed Central journal article supplement (PMC2923336)
Supplement: NIHMS190839-supplement.pdf [file NIHMS190839-supplement.pdf]

## ONLINE APPENDIX A

**Figure A1 about here.**

**Table A1**

### DESCRIPTIVE STATISTICS

| Variables                                                                    | Obs  | Mean     | SD       | Min    | Max    |
|------------------------------------------------------------------------------|------|----------|----------|--------|--------|
| <i>Active Follow-up variables</i>                                            |      |          |          |        |        |
| Cognitive function factor score                                              | 1794 | 0.000    | 1.413    | -5.696 | 4.097  |
| Temperature                                                                  | 1802 | 36.511   | 0.436    | 34     | 39.9   |
| Positive Blood smear                                                         | 1802 | 0.437    | 0.496    | 0      | 1      |
| Weight                                                                       | 1802 | 28.61795 | 7.941081 | 13.9   | 56.6   |
| Height                                                                       | 1802 | 132.135  | 12.6093  | 105    | 166    |
| Weight for age z-score                                                       | 1802 | -1.424   | 0.988    | -5.167 | 1.845  |
| Height for age z-score                                                       | 1802 | 3.999    | 0.345    | 2.834  | 5.270  |
| Haemoglobin concentration                                                    | 1802 | 12.045   | 1.391    | 6.6    | 16.4   |
| P falciparum parasitaemia (parasites / $\mu$ L)                              | 1802 | 920.482  | 6427.123 | 0      | 183275 |
| Clinical Malaria cases                                                       | 1802 | 0.016    | 0.127    | 0      | 1      |
| Asymptomatic Malaria                                                         | 1802 | 0.421    | 0.493    | 0      | 1      |
| Splenomegaly                                                                 | 1802 | 0.051    | 0.220    | 0      | 1      |
| Anemia                                                                       | 1802 | 0.218    | 0.429    | 0      | 2      |
| Helminth Infections                                                          | 1802 | 0.003    | 0.057    | 0      | 1      |
| Respiratory infections                                                       | 1802 | 0.011    | 0.107    | 0      | 1      |
| <i>Passive Follow-up variables</i>                                           |      |          |          |        |        |
| Clinical Malaria cases                                                       | 275  | 0.487    | 0.500    | 0      | 1      |
| Temperature                                                                  | 266  | 37.534   | 0.974    | 36     | 40.4   |
| Helminth Infections cases                                                    | 275  | 0.032    | 0.178    | 0      | 1      |
| Respiratory infections cases                                                 | 275  | 0.127    | 0.333    | 0      | 1      |
| <i>Academic School Outcomes</i>                                              |      |          |          |        |        |
| School Delay                                                                 | 167  | 0.285    | 1.227    | -3.630 | 4.079  |
| Standardized Academic school Notes                                           | 320  | 0.000    | 0.988    | -2.117 | 2.400  |
| <i>Interview variables (117 households, 227 children)</i>                    |      |          |          |        |        |
| Muslim                                                                       | 227  | 0.581    | 0.494    | 0      | 1      |
| Bambara ethnic group                                                         | 227  | 0.947    | 0.224    | 0      | 1      |
| Childhood Past Convulsion                                                    | 227  | 0.101    | 0.302    | 0      | 1      |
| Childhood Past Hospitalization                                               | 225  | 0.062    | 0.242    | 0      | 1      |
| Childhood Past Malnutrition                                                  | 222  | 0.045    | 0.207    | 0      | 1      |
| Mother alive                                                                 | 227  | 0.995    | 0.066    | 0      | 1      |
| Father alive                                                                 | 227  | 0.885    | 0.319    | 0      | 1      |
| Head of Household literate (can read or write)                               | 117  | 0.051    | 0.221    | 0      | 1      |
| Number of wife of the Head of Household                                      | 117  | 1.384    | 0.505    | 1      | 3      |
| Number of Children in the Household                                          | 117  | 5.880    | 2.871    | 0      | 16     |
| Number of persons who slept in the household the night before the interview  | 116  | 7.112    | 3.764    | 1      | 22     |
| Number of children who slept in the household the night before the interview | 117  | 4.119    | 2.930    | 0      | 19     |
| Bednet in the household                                                      | 117  | 0.512    | 0.501    | 0      | 1      |
| Insecticide treated bednet in the household                                  | 117  | 0.444    | 0.499    | 0      | 1      |
| Number of children who slept under net the day before the interview          | 117  | 0.461    | 1.038    | 0      | 5      |
| Use of Insecticides                                                          | 117  | 0.786    | 0.411    | 0      | 1      |

Table A2: Data on school characteristics

| Grade         | Number of Children Per classroom (%) | Children mean age | Children age SD | Cause of Teacher Absenteism | Teacher Absenteism in days (% of total) |
|---------------|--------------------------------------|-------------------|-----------------|-----------------------------|-----------------------------------------|
| Grade 1       | 59 (25.99)                           | 7.716             | 0.829           | Total                       | 20 (27.77)                              |
|               |                                      |                   |                 | Strike                      | 18 (25.00)                              |
|               |                                      |                   |                 | Disease                     | 1 (1.38)                                |
|               |                                      |                   |                 | Other (family, personal)    | 1 (1.38)                                |
| Grade 3       | 65 (28.63)                           | 9.905             | 1.265           | Total                       | 43 (59.72)                              |
|               |                                      |                   |                 | Strike                      | 18 (25.00)                              |
|               |                                      |                   |                 | Disease                     | 24 (33.33)                              |
|               |                                      |                   |                 | Other (family, personal)    | 1 (1.38)                                |
| Grade 4 and 5 | 86 (37.89)                           | 12.649            | 1.679           | Total                       | 6 (8.33)                                |
|               |                                      |                   |                 | Strike                      | 3 (4.16)                                |
|               |                                      |                   |                 | Disease                     | 2 (2.77)                                |
|               |                                      |                   |                 | Other (family, personal)    | 1 (1.38)                                |
| Grade 6       | 17 (7.49)                            | 13.808            | 2.105           | Total                       | 3 (4.16)                                |
| Total         | 227 (100)                            | 10.667            | 2.584           | Total                       | 72 (100)                                |
|               |                                      |                   |                 | Strike                      | 42 (58.33)                              |
|               |                                      |                   |                 | Disease                     | 27 (37.50)                              |
|               |                                      |                   |                 | Other (family, personal)    | 3 (4.16)                                |

Notes. - Number of children in Grade 4 is 16 (7.05%) and in Grade 5 is 70 (30.84%). Because of insufficient teachers, Grade 4 and 5 have been grouped in one classroom.

**Table A3**

## ABSENTEEISM BY CAUSE

| Cause of absenteeism                                        | Number of lost days |
|-------------------------------------------------------------|---------------------|
| Health                                                      | 34.5 (75.82)        |
| Confirmed Malaria Cases                                     | 12.5 (27.47)        |
| Malaria Coinfections                                        | 2 (4.39)            |
| Pregnancy                                                   | 9 (19.78)           |
| Respiratory Infections                                      | 2.5 (5.49)          |
| Headache                                                    | 1.5 (3.29)          |
| Wounds/Burn/Whitlow                                         | 2 (4.39)            |
| Helminth Infections                                         | 0.5 (1.09)          |
| Dysentery/Food Poisoning                                    | 1 (2.19)            |
| Caries                                                      | 0.5 (1.09)          |
| Sent to the health center by the teacher but not ill        | 2 (4.39)            |
| Sent to the health center by the teacher but did not come   | 1 (2.19)            |
| Exclusion for economic reason (subscription fees not payed) | 3 (6.59)            |
| Unknown                                                     | 8 (17.58)           |
| Total                                                       | 45.5 (100)          |

Notes. - Percent of total lost days in parenthesis. Some children had malaria coinfections. Two children had malaria and respiratory infection (1 day lost) and one child had malaria and wound (1 day lost).

**Table A4**

**HOUSEHOLD SOCIO-ECONOMIC CHARACTERISTICS**

|                                                        | All Households |           |           |                     | Means            |                  |
|--------------------------------------------------------|----------------|-----------|-----------|---------------------|------------------|------------------|
|                                                        | Scoring Factor | Means     | SD        | Impact on PCA score | Poorest Quintile | Richest Quintile |
| Variables used for Convenience Property Index:         |                |           |           |                     |                  |                  |
| House characteristics:                                 |                |           |           |                     |                  |                  |
| Floor is made of finish surface                        | 0.267          | 0.230     | 0.423     | 0.631               | 0.043            | 0.583            |
| Roof material is corrugated iron                       | 0.282          | 0.863     | 0.345     | 0.817               | 0.478            | 1.000            |
| Number of buildings                                    | 0.156          | 2.564     | 1.385     | 0.112               | 2.347            | 3.208            |
| Number of rooms                                        | 0.232          | 4.358     | 2.328     | 0.099               | 3.565            | 5.833            |
| Other place of residence                               | 0.124          | 0.051     | 0.221     | 0.561               | 0.000            | 0.083            |
| Household has Pit Toilet                               | 0.111          | 0.452     | 0.499     | 0.222               | 0.260            | 0.541            |
| Household owns at least one:                           |                |           |           |                     |                  |                  |
| Radio                                                  | 0.272          | 0.641     | 0.481     | 0.565               | 0.217            | 0.875            |
| Watch                                                  | 0.261          | 0.512     | 0.501     | 0.520               | 0.130            | 0.750            |
| Television                                             | 0.157          | 0.170     | 0.378     | 0.415               | 0.043            | 0.291            |
| Bicycle                                                | 0.219          | 0.658     | 0.476     | 0.460               | 0.260            | 0.875            |
| Motorcycle                                             | 0.379          | 0.555     | 0.499     | 0.759               | 0.086            | 0.916            |
| Car                                                    | 0.163          | 0.008     | 0.092     | 1.771               | 0.000            | 0.041            |
| Mobile Phone                                           | 0.244          | 0.111     | 0.315     | 0.774               | 0.000            | 0.333            |
| Cart                                                   | 0.324          | 0.376     | 0.486     | 0.666               | 0.043            | 0.791            |
| Plough                                                 | 0.266          | 0.128     | 0.335     | 0.794               | 0.000            | 0.458            |
| Donkey                                                 | 0.345          | 0.230     | 0.423     | 0.815               | 0.000            | 0.666            |
| Socio-economic Indices:                                |                |           |           |                     |                  |                  |
| Convenience Property Score                             | .              | 0.000     | 1.698     | .                   | -2.253           | 2.399            |
| Store-of-value Property (CFA Francs)                   | .              | 209350.44 | 386351.76 | .                   | 91268.1          | 370302.06        |
| Productive Capital Property:                           |                |           |           |                     |                  |                  |
| Land Area property dedicated to agriculture (Hectares) | .              | 2.243     | 2.546     | .                   | 1.833            | 2.368            |
| Electric Pump to irrigate                              | .              | 0.487     | 0.500     | .                   | 0.289            | 0.652            |
| Monetary Income (CFA Francs)                           | .              | 49966.52  | 78002.22  | .                   | 11224.64         | 82791.67         |
| Savings (dummy variable)                               | .              | 0.165     | 0.275     | .                   | 0.086            | 0.208            |
| Access to Informal credit (dummy variable)             | .              | 0.854     | 0.271     | .                   | 0.898            | 0.833            |

Notes. - Except for the number of buildings and the number of rooms, each variable takes the value 1 if true, 0 otherwise. Scoring factor is the "weight" assigned to each variable (normalized by its mean and standard deviation) in the linear combination of the variables that constitute the first principal component. Impact on PCA score is the impact of a change of an increase one unit for each variable (= Scoring factor / SD). The percentage of the covariance explained by the first principal component is 16%. The first eigenvalue is 2.89; the second eigenvalue is 2.30. Quintiles were defined on the basis of the Convenience Property PCA score. There was no formal access to credit.

**Table A5**

**FACTORS ASSOCIATED WITH COGNITIVE FUNCTION FACTOR SCORE (TABLE 4 CONTROL VARIABLES)**

| Variables                                              | Dependant variable is cognitive function PCA score |                      |                      |                      |                      |
|--------------------------------------------------------|----------------------------------------------------|----------------------|----------------------|----------------------|----------------------|
|                                                        | OLS models                                         |                      |                      |                      |                      |
|                                                        | (1)                                                | (2)                  | (3)                  | (4)                  | (5)                  |
| Convenience Property Score                             | -0.004<br>(0.024)                                  | -0.008<br>(0.024)    | -0.008<br>(0.024)    | -0.009<br>(0.024)    | -0.008<br>(0.024)    |
| Monetary Income (CFA Francs)                           | 0.000<br>(0.000)                                   | 0.000<br>(0.000)     | 0.000<br>(0.000)     | 0.000<br>(0.000)     | 0.000<br>(0.000)     |
| Store-of-value Property (CFA Francs)                   | -0.000<br>(0.000)                                  | -0.000<br>(0.000)    | -0.000<br>(0.000)    | -0.000<br>(0.000)    | -0.000<br>(0.000)    |
| Land Area property dedicated to agriculture (Hectares) | -0.026***<br>(0.007)                               | -0.024***<br>(0.007) | -0.024***<br>(0.007) | -0.024***<br>(0.007) | -0.024***<br>(0.007) |
| Saving dummy                                           | 0.074<br>(0.078)                                   | 0.073<br>(0.079)     | 0.071<br>(0.078)     | 0.073<br>(0.078)     | 0.076<br>(0.078)     |
| Access to Informal credit dummy                        | 0.560***<br>(0.166)                                | 0.540***<br>(0.167)  | 0.548***<br>(0.167)  | 0.545***<br>(0.167)  | 0.545***<br>(0.167)  |
| Male                                                   | 0.152**<br>(0.067)                                 | 0.143**<br>(0.068)   | 0.143**<br>(0.068)   | 0.140**<br>(0.068)   | 0.141**<br>(0.068)   |
| Muslim                                                 | 0.078<br>(0.066)                                   | 0.095<br>(0.066)     | 0.090<br>(0.066)     | 0.090<br>(0.066)     | 0.090<br>(0.066)     |
| Bambara ethnic group                                   | -0.003<br>(0.129)                                  | -0.030<br>(0.128)    | -0.027<br>(0.128)    | -0.026<br>(0.129)    | -0.028<br>(0.129)    |
| Age of the Head of Household                           | 0.005<br>(0.003)                                   | 0.004<br>(0.003)     | 0.004<br>(0.003)     | 0.004<br>(0.003)     | 0.004<br>(0.003)     |
| Head of Household literate (can read or write)         | 0.409***<br>(0.128)                                | 0.404***<br>(0.130)  | 0.420***<br>(0.128)  | 0.408***<br>(0.130)  | 0.416***<br>(0.131)  |
| Labour hours of the child                              | 0.026*<br>(0.015)                                  | 0.028*<br>(0.015)    | 0.029*<br>(0.015)    | 0.030**<br>(0.015)   | 0.031**<br>(0.015)   |
| Time per week dedicated to do homeworks                | 0.472***<br>(0.103)                                | 0.469***<br>(0.103)  | 0.468***<br>(0.103)  | 0.468***<br>(0.103)  | 0.470***<br>(0.103)  |
| Somebody can help the child to do homeworks (dummy)    | 0.132<br>(0.091)                                   | 0.137<br>(0.092)     | 0.138<br>(0.092)     | 0.134<br>(0.092)     | 0.132<br>(0.092)     |
| Father alive                                           | 0.007<br>(0.097)                                   | 0.006<br>(0.097)     | 0.003<br>(0.097)     | -0.002<br>(0.097)    | -0.002<br>(0.097)    |
| Mother Alive                                           | 0.313<br>(0.261)                                   | 0.275<br>(0.261)     | 0.303<br>(0.261)     | 0.279<br>(0.262)     | 0.289<br>(0.261)     |
| Grade 3 dummy                                          | -0.889***<br>(0.095)                               | -0.879***<br>(0.095) | -0.877***<br>(0.095) | -0.868***<br>(0.095) | -0.872***<br>(0.095) |
| Grade 4 and 5 dummy                                    | -2.104***<br>(0.157)                               | -2.111***<br>(0.158) | -2.100***<br>(0.158) | -2.092***<br>(0.159) | -2.097***<br>(0.158) |
| Grade 6 dummy                                          | -3.393***<br>(0.278)                               | -3.383***<br>(0.280) | -3.379***<br>(0.280) | -3.361***<br>(0.280) | -3.374***<br>(0.280) |
| Age 7                                                  | 0.555***<br>(0.177)                                | 0.529***<br>(0.193)  | 0.531***<br>(0.190)  | 0.509***<br>(0.193)  | 0.507***<br>(0.194)  |
| Age 8                                                  | 1.106***<br>(0.187)                                | 1.074***<br>(0.203)  | 1.089***<br>(0.198)  | 1.061***<br>(0.202)  | 1.059***<br>(0.203)  |
| Age 9                                                  | 1.530***<br>(0.223)                                | 1.486***<br>(0.237)  | 1.495***<br>(0.233)  | 1.469***<br>(0.236)  | 1.472***<br>(0.237)  |
| Age 10                                                 | 1.818***<br>(0.236)                                | 1.755***<br>(0.251)  | 1.764***<br>(0.246)  | 1.731***<br>(0.250)  | 1.738***<br>(0.251)  |
| Age 11                                                 | 2.226***<br>(0.274)                                | 2.152***<br>(0.288)  | 2.168***<br>(0.284)  | 2.128***<br>(0.287)  | 2.134***<br>(0.287)  |
| Age 12                                                 | 2.818***<br>(0.303)                                | 2.771***<br>(0.314)  | 2.775***<br>(0.310)  | 2.740***<br>(0.314)  | 2.748***<br>(0.314)  |
| Age 13                                                 | 3.246***<br>(0.307)                                | 3.175***<br>(0.320)  | 3.187***<br>(0.316)  | 3.147***<br>(0.319)  | 3.159***<br>(0.319)  |
| Age 14                                                 | 3.734***<br>(0.309)                                | 3.633***<br>(0.321)  | 3.643***<br>(0.316)  | 3.609***<br>(0.319)  | 3.615***<br>(0.319)  |
| Age 15                                                 | 3.831***<br>(0.383)                                | 3.727***<br>(0.396)  | 3.742***<br>(0.391)  | 3.678***<br>(0.394)  | 3.689***<br>(0.394)  |
| Age 16                                                 | 4.417***<br>(0.375)                                | 4.311***<br>(0.387)  | 4.326***<br>(0.384)  | 4.295***<br>(0.387)  | 4.305***<br>(0.386)  |
| Age 17                                                 | 4.687***<br>(0.462)                                | 4.543***<br>(0.470)  | 4.587***<br>(0.466)  | 4.497***<br>(0.465)  | 4.513***<br>(0.467)  |

Notes. - Huber White standard errors are reported in parenthesis. Reference category for grade is Grade 1. Reference category for age is Age 6.

\*\*\* denotes statistical significance at the 1% level.

\*\* at the 5% level

\* at the 10% level.

## ONLINE APPENDIX B

### Table B1

FIXED-EFFECTS (WITHIN CHILD) ESTIMATIONS WITH OTHER DEPENDANT VARIABLES FOR  
COGNITIVE ACHIEVEMENT

| Corresponding Regression Number and variables as in Table 5                       | Fixed-effects models (within child) |                                        |                      |                      |
|-----------------------------------------------------------------------------------|-------------------------------------|----------------------------------------|----------------------|----------------------|
|                                                                                   | Dependant variable is:              |                                        |                      |                      |
|                                                                                   | Writing Skills                      | Visual Memory &<br>Selective Attention | Vocabulary           | Inductive Reasoning  |
| <i>Results for regression (1)</i>                                                 |                                     |                                        |                      |                      |
| Asymptomatic Malaria (active follow-up)                                           | -0.139**<br>(0.057)                 | -0.032<br>(0.036)                      | -0.113*<br>(0.058)   | -0.134***<br>(0.048) |
| Lagged Asymptomatic Malaria (active follow-up)                                    | -0.068<br>(0.051)                   | -0.016<br>(0.035)                      | -0.095*<br>(0.057)   | -0.052<br>(0.044)    |
| Clinical Malaria (between two active follow-up or during active follow-up)        | -0.453***<br>(0.070)                | -0.170***<br>(0.056)                   | -0.245***<br>(0.090) | -0.302***<br>(0.062) |
| Lagged Clinical Malaria (between two active follow-up or during active follow-up) | -0.241***<br>(0.061)                | -0.034<br>(0.039)                      | -0.087<br>(0.083)    | -0.080<br>(0.049)    |
| <i>Results for regression (2)</i>                                                 |                                     |                                        |                      |                      |
| Monthly Geom Mean <i>P. falciparum</i> Parasitaemia (/1000)                       | -0.024**<br>(0.010)                 | -0.015*<br>(0.008)                     | -0.046***<br>(0.016) | -0.019*<br>(0.010)   |
| Lagged Monthly Geom Mean <i>P. falciparum</i> Parasitaemia (/1000)                | -0.018*<br>(0.010)                  | -0.002<br>(0.006)                      | -0.029***<br>(0.010) | -0.036***<br>(0.011) |
| Clinical Malaria (between two active follow-up or during active follow-up)        | -0.451***<br>(0.071)                | -0.169***<br>(0.056)                   | -0.245***<br>(0.090) | -0.293***<br>(0.062) |
| Lagged Clinical Malaria (between two active follow-up or during active follow-up) | -0.222***<br>(0.062)                | -0.025<br>(0.041)                      | -0.072<br>(0.082)    | -0.073<br>(0.050)    |
| <i>Results for regression (3)</i>                                                 |                                     |                                        |                      |                      |
| <i>P. falciparum</i> Parasitaemia thresholds (active follow-up)                   |                                     |                                        |                      |                      |
| 500                                                                               | -0.132**<br>(0.057)                 | -0.060<br>(0.042)                      | -0.279***<br>(0.065) | -0.171***<br>(0.056) |
| Lagged 500                                                                        | -0.162***<br>(0.054)                | -0.066*<br>(0.039)                     | -0.088<br>(0.060)    | -0.119**<br>(0.050)  |
| Clinical Malaria (between two active follow-up or during active follow-up)        | -0.434***<br>(0.070)                | -0.161***<br>(0.056)                   | -0.239***<br>(0.090) | -0.288***<br>(0.063) |
| Lagged Clinical Malaria (between two active follow-up or during active follow-up) | -0.227***<br>(0.061)                | -0.032<br>(0.039)                      | -0.087<br>(0.081)    | -0.080<br>(0.049)    |
| <i>Results for regression (4)</i>                                                 |                                     |                                        |                      |                      |
| <i>P. falciparum</i> Parasitaemia thresholds (active follow-up)                   |                                     |                                        |                      |                      |
| 1000                                                                              | -0.231***<br>(0.065)                | -0.099*<br>(0.053)                     | -0.238***<br>(0.084) | -0.197***<br>(0.073) |
| Lagged 1000                                                                       | -0.211***<br>(0.063)                | -0.037<br>(0.043)                      | -0.152**<br>(0.066)  | -0.164***<br>(0.062) |
| Clinical Malaria (between two active follow-up or during active follow-up)        | -0.435***<br>(0.070)                | -0.165***<br>(0.056)                   | -0.237***<br>(0.091) | -0.285***<br>(0.062) |
| Lagged Clinical Malaria (between two active follow-up or during active follow-up) | -0.227***<br>(0.061)                | -0.031<br>(0.040)                      | -0.078<br>(0.082)    | -0.072<br>(0.049)    |
| <i>Results for regression (5)</i>                                                 |                                     |                                        |                      |                      |
| <i>P. falciparum</i> Parasitaemia thresholds (active follow-up)                   |                                     |                                        |                      |                      |
| 1200                                                                              | -0.204***<br>(0.067)                | -0.116**<br>(0.056)                    | -0.313***<br>(0.085) | -0.187***<br>(0.072) |
| Lagged 1200                                                                       | -0.221***<br>(0.062)                | -0.019<br>(0.046)                      | -0.176**<br>(0.069)  | -0.167***<br>(0.063) |
| Clinical Malaria (between two active follow-up or during active follow-up)        | -0.442***<br>(0.070)                | -0.167***<br>(0.056)                   | -0.232**<br>(0.091)  | -0.287***<br>(0.063) |
| Lagged Clinical Malaria (between two active follow-up or during active follow-up) | -0.237***<br>(0.062)                | -0.032<br>(0.040)                      | -0.079<br>(0.081)    | -0.074<br>(0.049)    |

Notes. - Huber White standard errors are reported in parenthesis. Models used are the same fixed-effects models as in Table 5 but only the main coefficients of malaria measures (asymptomatic malaria, parasitaemia and clinical malaria) have been reported here with the corresponding regression numbers and variables.

\*\*\* denotes statistical significance at the 1% level.

\*\* denotes statistical significance at the 5% level.

\* denotes statistical significance at the 10% level.

**Table B2**

**FACTORS ASSOCIATED WITH ACADEMIC PERFORMANCE AND SCHOOL DELAY**

| Variables                                                                 | Dependant variable is standardized academic school notes |                       |                      |                      |                      | Dependant variable is school attainment |                     |                      |                      |                      |
|---------------------------------------------------------------------------|----------------------------------------------------------|-----------------------|----------------------|----------------------|----------------------|-----------------------------------------|---------------------|----------------------|----------------------|----------------------|
|                                                                           | Fixed-effects model (within child)                       | Random-effects models |                      |                      |                      | OLS regressions                         |                     |                      |                      |                      |
|                                                                           | (1)                                                      | (2)                   | (3)                  | (4)                  | (5)                  | (6)                                     | (7)                 | (8)                  | (9)                  | (10)                 |
| <b>Malaria Index</b>                                                      |                                                          |                       |                      |                      |                      |                                         |                     |                      |                      |                      |
| Geom Mean <i>P. falciparum</i> Parasitemia (/1000)                        | -0.128*<br>(0.074)                                       | -0.125***<br>(0.041)  | -0.127***<br>(0.041) | -0.120***<br>(0.043) | -0.122***<br>(0.043) | -1.758**<br>(0.855)                     | -0.943<br>(0.697)   | -1.494**<br>(0.636)  | -0.770<br>(0.732)    | -1.153*<br>(0.655)   |
| Probability of sleeping under mosquito net the night before the interview | .                                                        | 0.040<br>(0.219)      | 0.042<br>(0.217)     | 0.141<br>(0.232)     | 0.153<br>(0.232)     | .                                       | 0.828***<br>(0.244) | 0.768***<br>(0.252)  | 0.636**<br>(0.292)   | 0.604**<br>(0.283)   |
| <b>Health control</b>                                                     |                                                          |                       |                      |                      |                      |                                         |                     |                      |                      |                      |
| Weight for Age z-score                                                    | .                                                        | 0.068<br>(0.089)      | .                    | 0.089<br>(0.092)     | .                    | .                                       | 0.440***<br>(0.106) | .                    | 0.441***<br>(0.110)  | .                    |
| Height for Age z-score                                                    | .                                                        | .                     | 0.035<br>(0.313)     | .                    | 0.290<br>(0.329)     | .                                       | .                   | 1.890***<br>(0.233)  | .                    | 1.846***<br>(0.234)  |
| <b>Other Controls</b>                                                     |                                                          |                       |                      |                      |                      |                                         |                     |                      |                      |                      |
| Age (years)                                                               | .                                                        | 0.278***<br>(0.054)   | 0.263***<br>(0.052)  | 0.267***<br>(0.059)  | 0.273***<br>(0.060)  | .                                       | .                   | .                    | .                    | .                    |
| Male                                                                      | .                                                        | .                     | .                    | -0.076<br>(0.161)    | -0.132<br>(0.151)    | .                                       | .                   | .                    | 0.462**<br>(0.201)   | 0.201<br>(0.142)     |
| Muslim                                                                    | .                                                        | .                     | .                    | 0.180<br>(0.137)     | 0.183<br>(0.138)     | .                                       | .                   | .                    | -0.020<br>(0.182)    | -0.065<br>(0.170)    |
| Bambara                                                                   | .                                                        | .                     | .                    | -0.280<br>(0.355)    | -0.286<br>(0.350)    | .                                       | .                   | .                    | -0.090<br>(0.398)    | -0.213<br>(0.234)    |
| Age of the head of household                                              | .                                                        | .                     | .                    | 0.006<br>(0.008)     | 0.005<br>(0.008)     | .                                       | .                   | .                    | -0.021***<br>(0.007) | -0.022***<br>(0.006) |
| Head of Household literate (can read or write)                            | .                                                        | .                     | .                    | 0.369<br>(0.285)     | 0.401<br>(0.294)     | .                                       | .                   | .                    | 0.572*<br>(0.298)    | 0.665***<br>(0.219)  |
| Convenience Property score                                                | .                                                        | .                     | .                    | -0.055<br>(0.041)    | -0.048<br>(0.040)    | .                                       | .                   | .                    | 0.044<br>(0.049)     | 0.072<br>(0.048)     |
| Time per week dedicated to do homeworks                                   | .                                                        | .                     | .                    | 0.509***<br>(0.164)  | 0.514***<br>(0.168)  | .                                       | .                   | .                    | 0.081<br>(0.234)     | 0.239<br>(0.211)     |
| Father alive                                                              | .                                                        | .                     | .                    | -0.114<br>(0.253)    | -0.149<br>(0.247)    | .                                       | .                   | .                    | 0.204<br>(0.330)     | -0.013<br>(0.237)    |
| Mother alive                                                              | .                                                        | .                     | .                    | 0.512<br>(0.364)     | 0.514<br>(0.376)     | .                                       | .                   | .                    | 0.576<br>(0.370)     | 0.678**<br>(0.309)   |
| Intercept                                                                 | 0.021<br>(0.024)                                         | -2.658***<br>(0.499)  | -2.738*<br>(1.564)   | -3.072***<br>(0.832) | -4.305**<br>(1.862)  | 0.408***<br>(0.102)                     | 0.669*<br>(0.359)   | -8.117***<br>(1.067) | 0.448<br>(1.120)     | -8.432***<br>(1.376) |
| Observations                                                              | 320                                                      | 320                   | 320                  | 320                  | 320                  | 167                                     | 167                 | 167                  | 167                  | 167                  |
| Number of Children                                                        | 167                                                      | 167                   | 167                  | 167                  | 167                  | 167                                     | 167                 | 167                  | 167                  | 167                  |
| R squared                                                                 | 0.038                                                    | 0.177                 | 0.173                | 0.261                | 0.260                | 0.036                                   | 0.213               | 0.336                | 0.295                | 0.429                |

Notes. - Huber White standard errors are reported in parenthesis. Results are not changed when standard errors are clustered at the household level (not presented here). *R* squared given for the fixed effects regression (1) is within *R* squared. For random effects models (2), (3), (4), (5), between *R* squared is presented. Other control variables are grade dummies.

\*\*\* denotes statistical significance at the 1% level.

\*\* denotes statistical significance at the 5% level.

\* denotes statistical significance at the 10% level.
